# Supplementary material
Source: PubMed Central journal article supplement (PMC8900676)

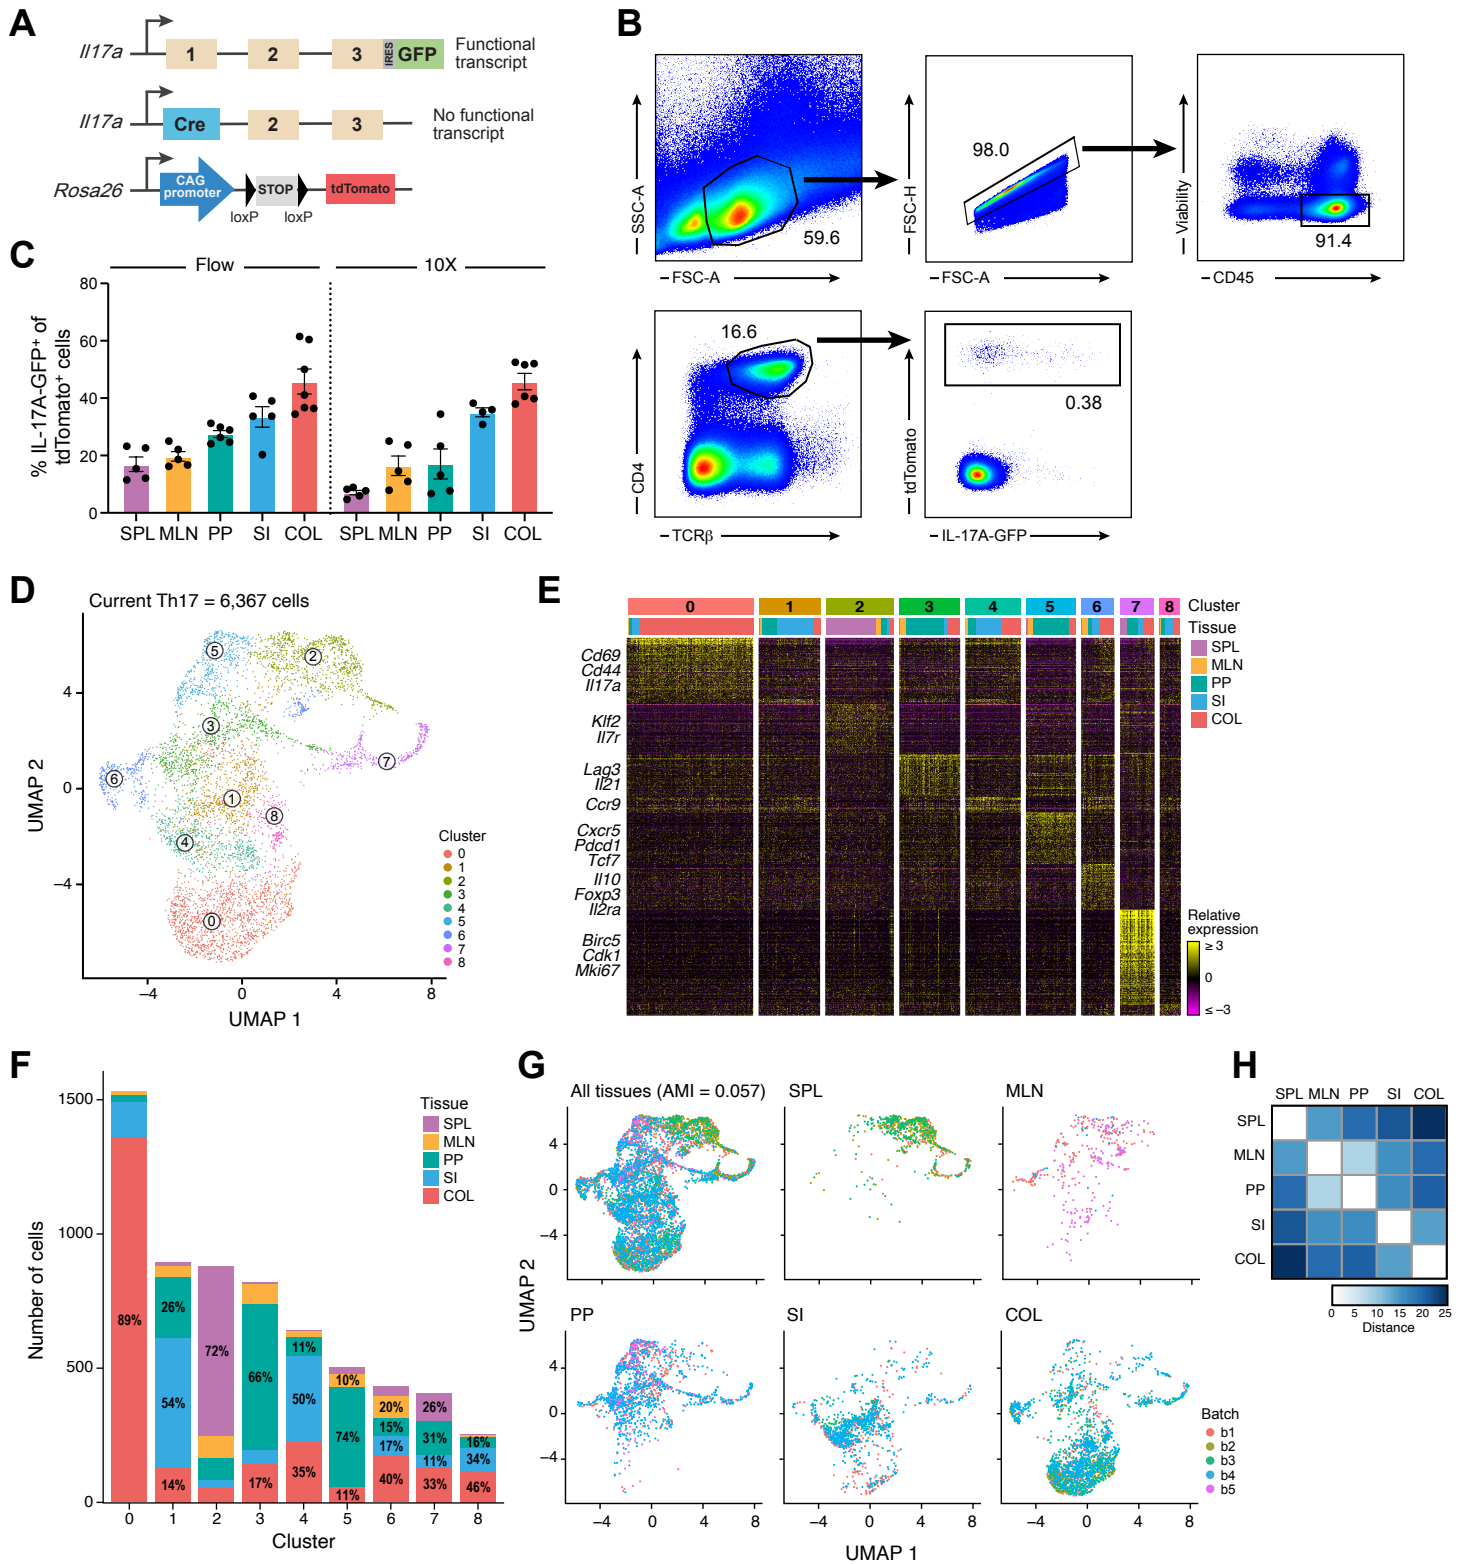

Supplement: NIHMS1758271-supplement-1.pdf [file NIHMS1758271-supplement-1.pdf]

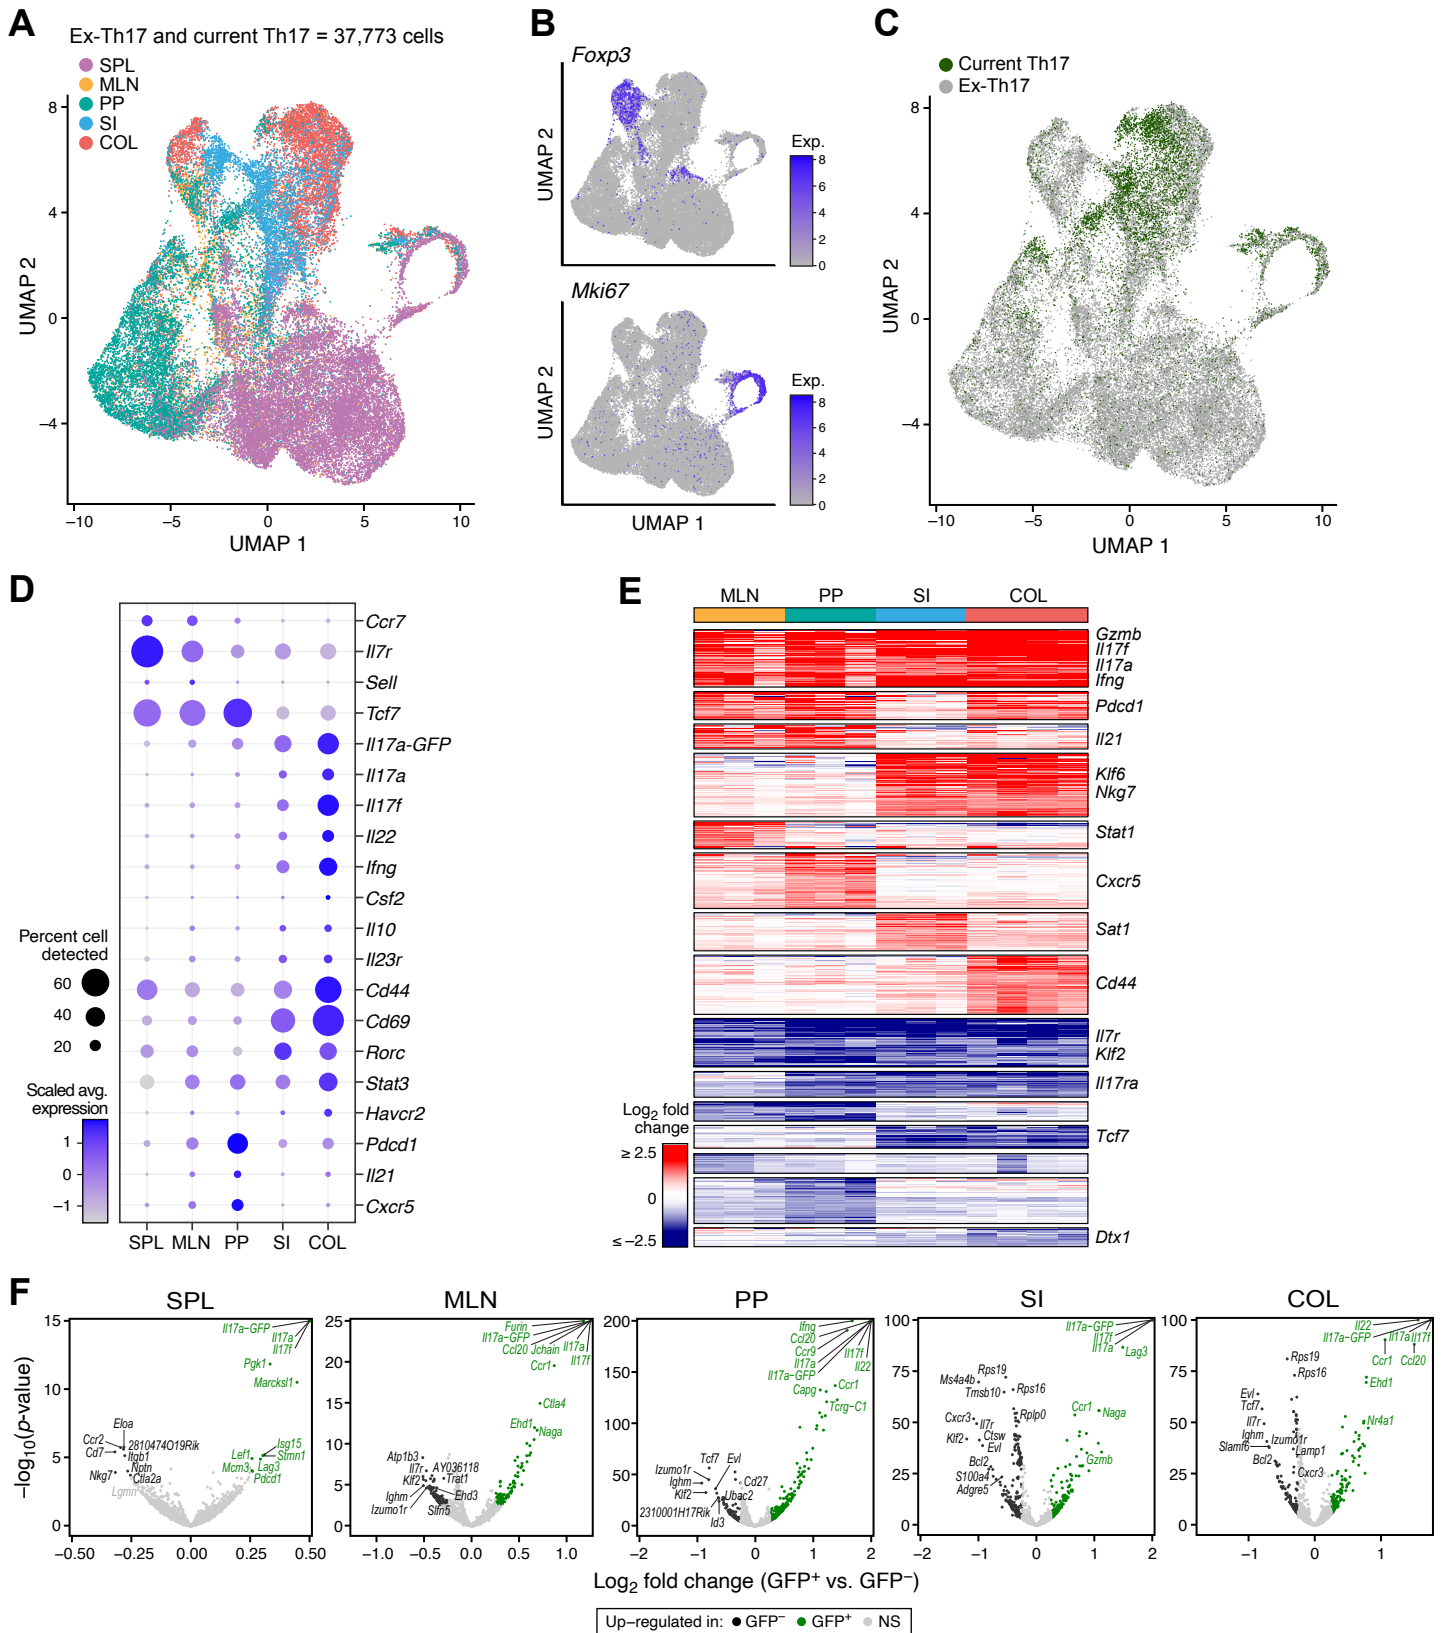

Supplement: NIHMS1758271-supplement-2.pdf [file NIHMS1758271-supplement-2.pdf]

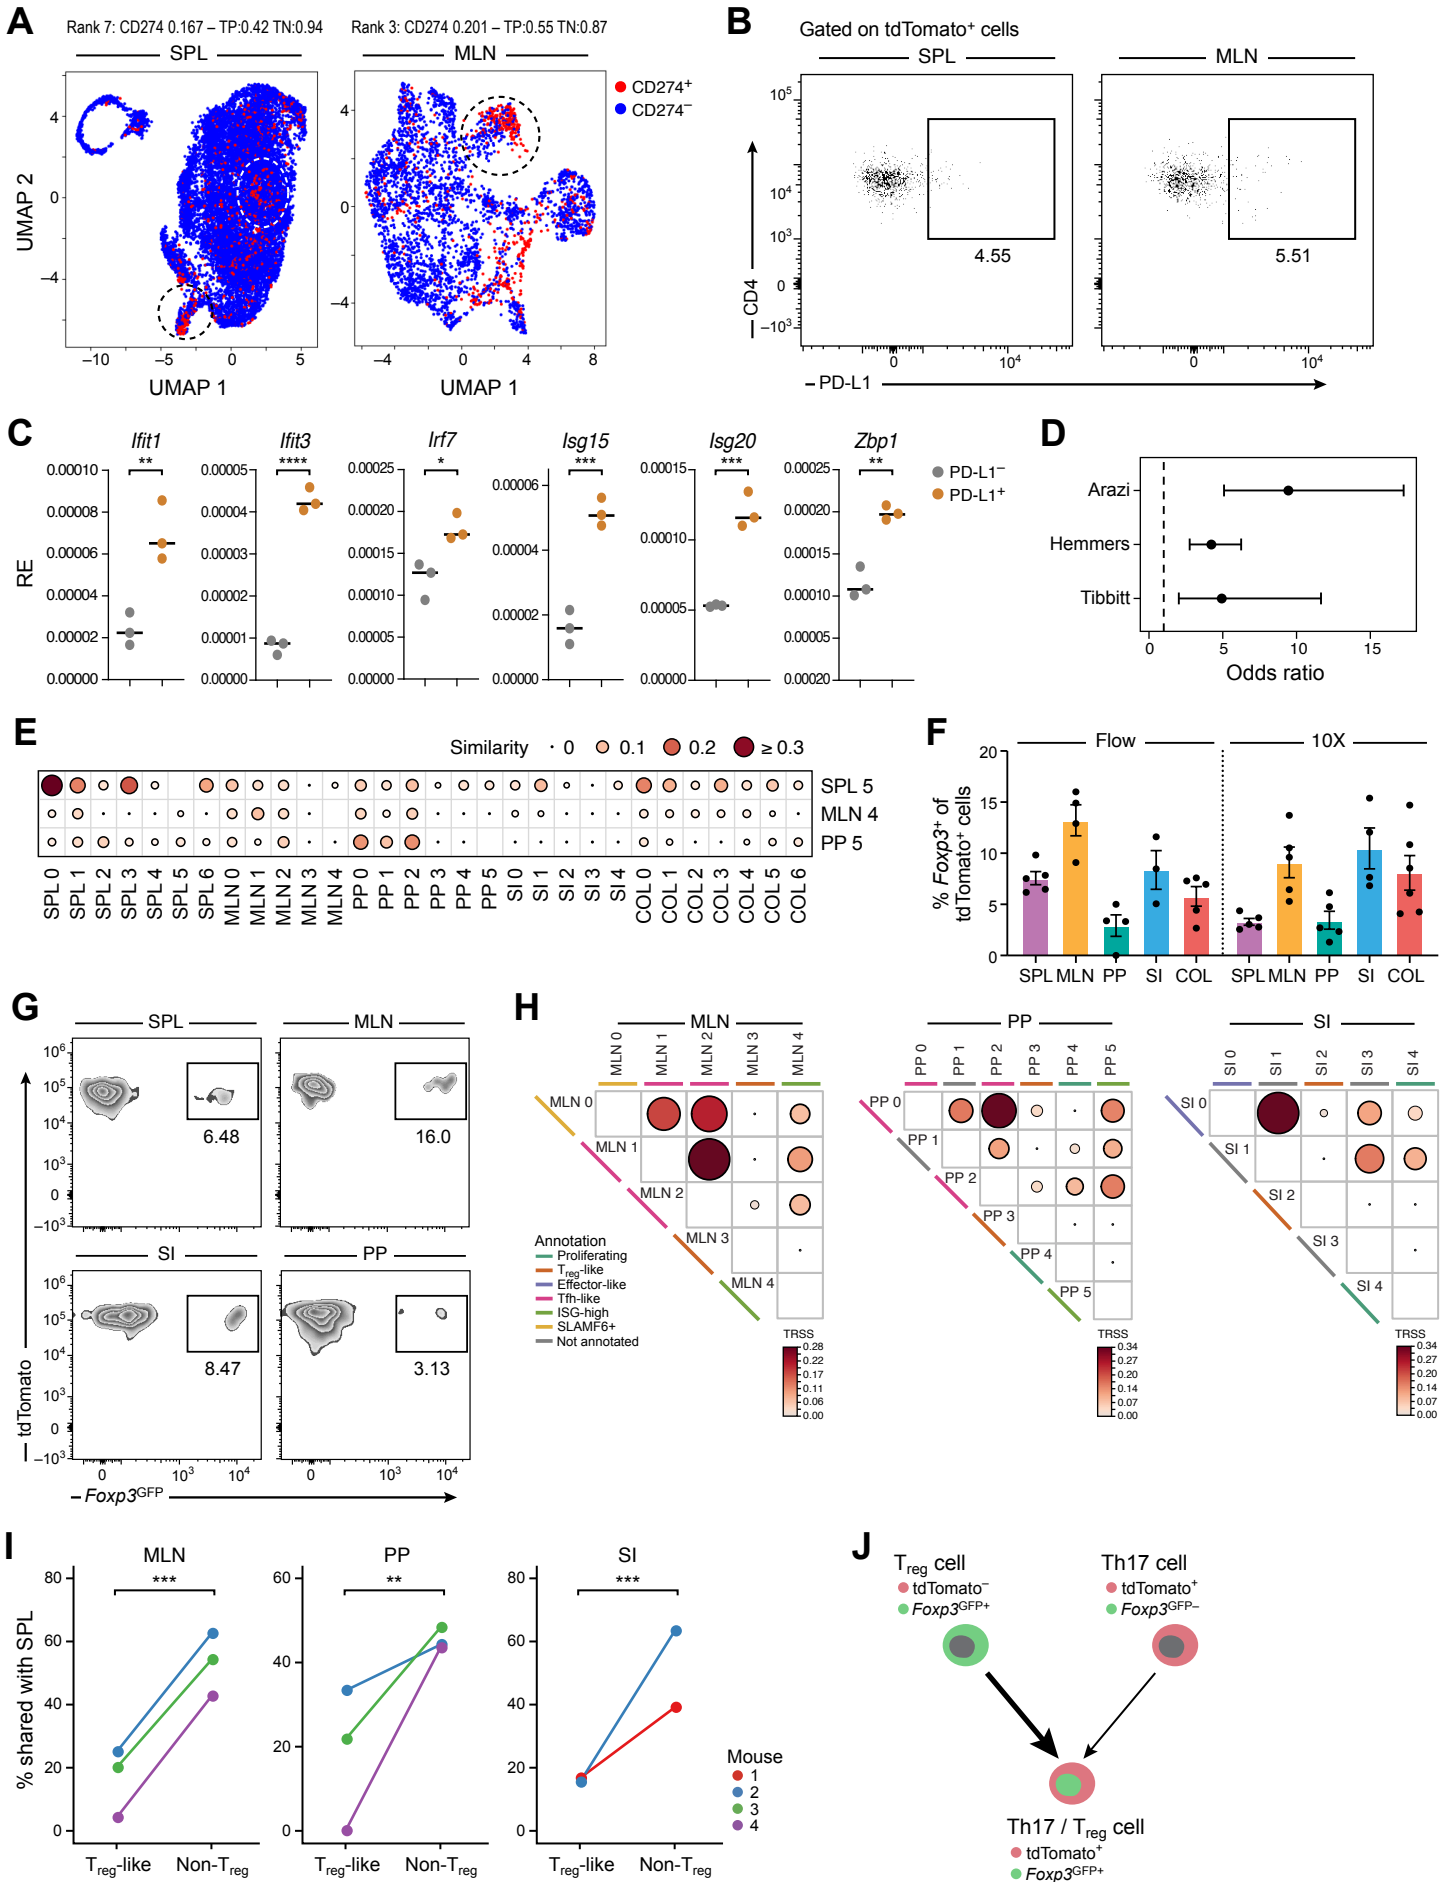

Supplement: NIHMS1758271-supplement-3.pdf [file NIHMS1758271-supplement-3.pdf]

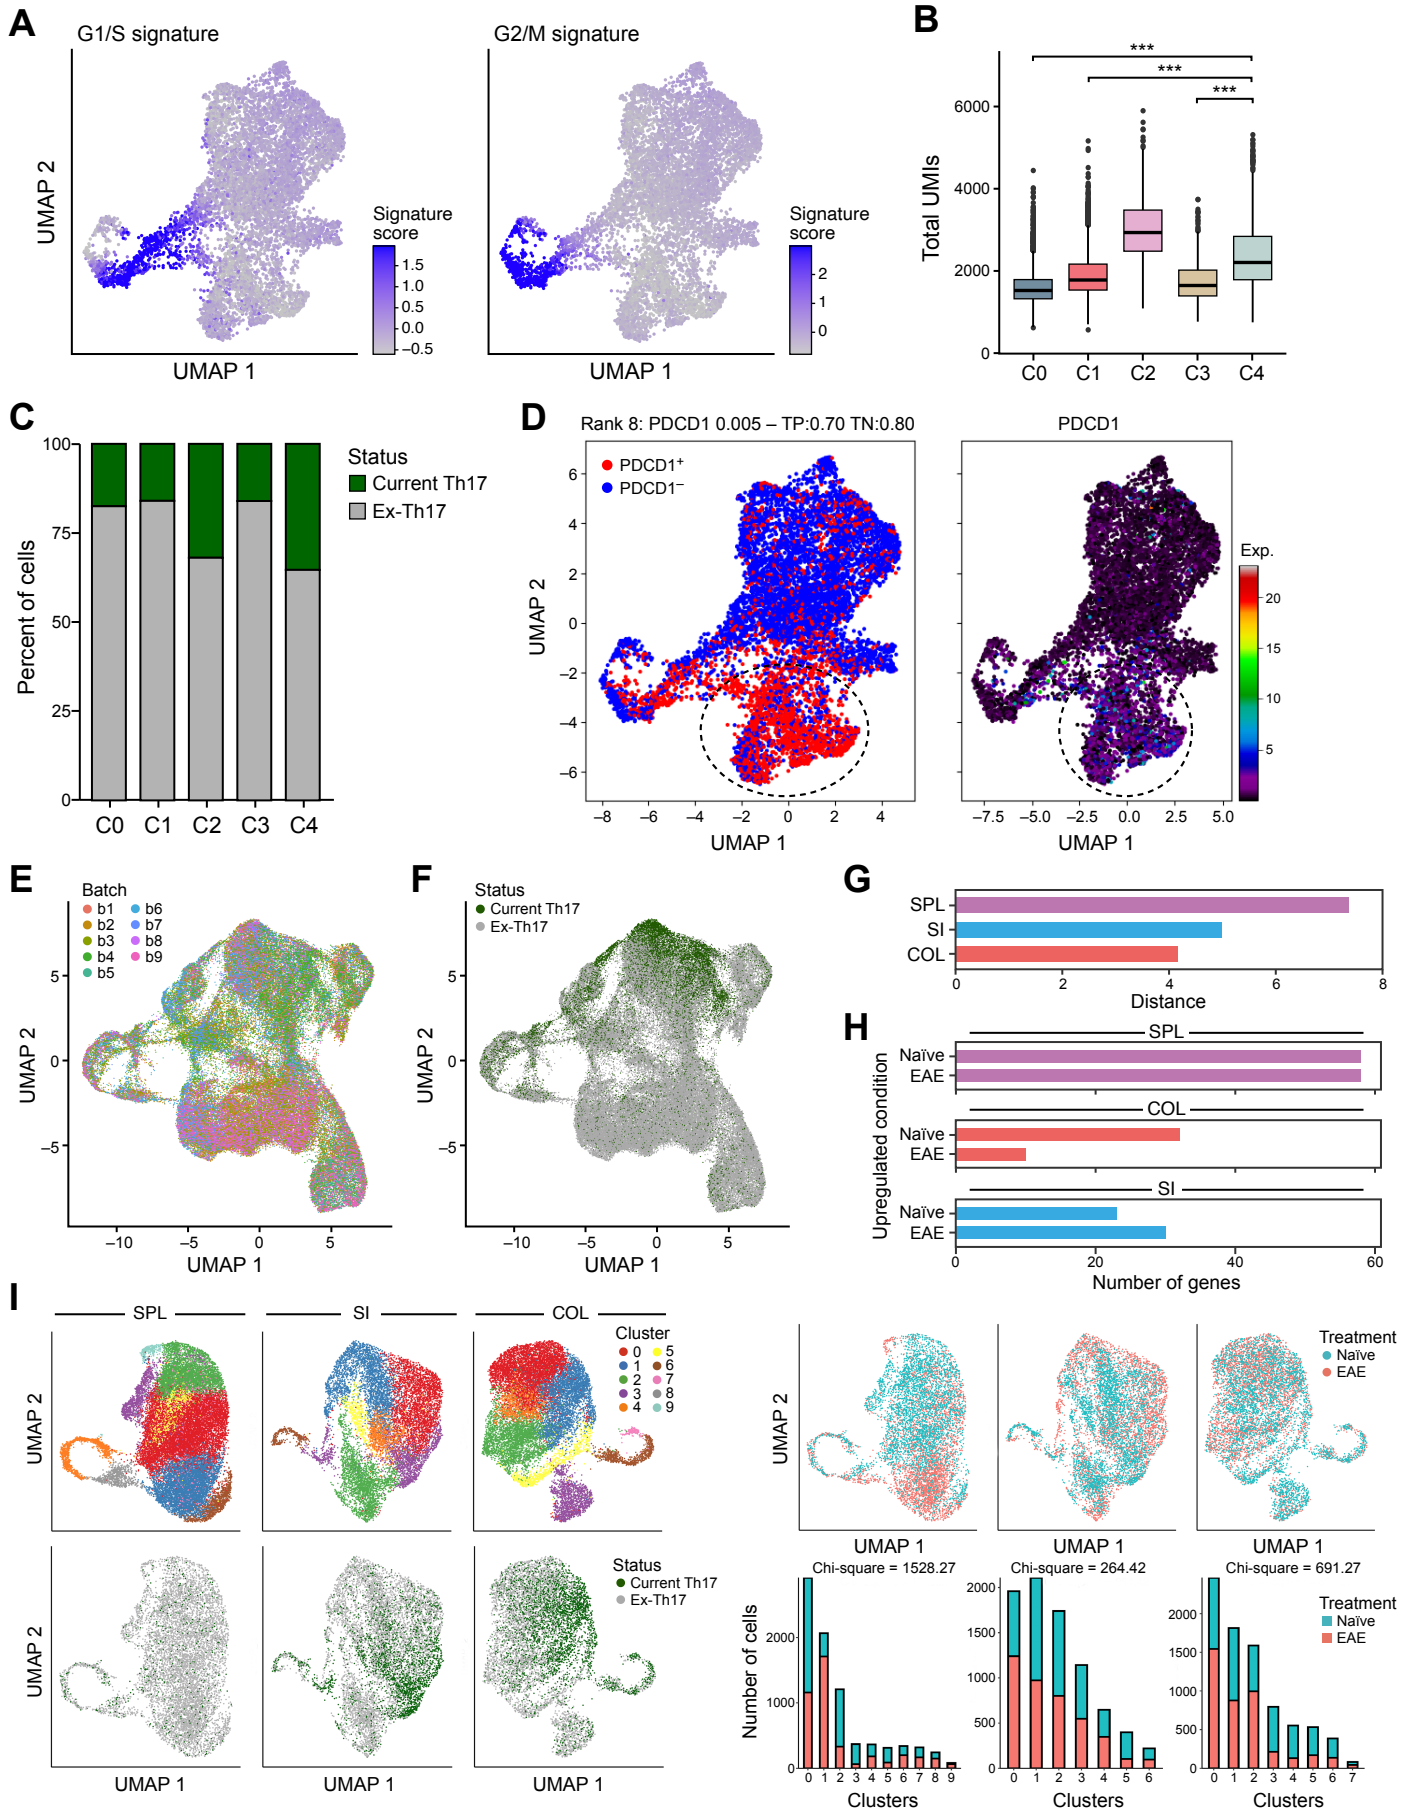

Supplement: NIHMS1758271-supplement-4.pdf [file NIHMS1758271-supplement-4.pdf]

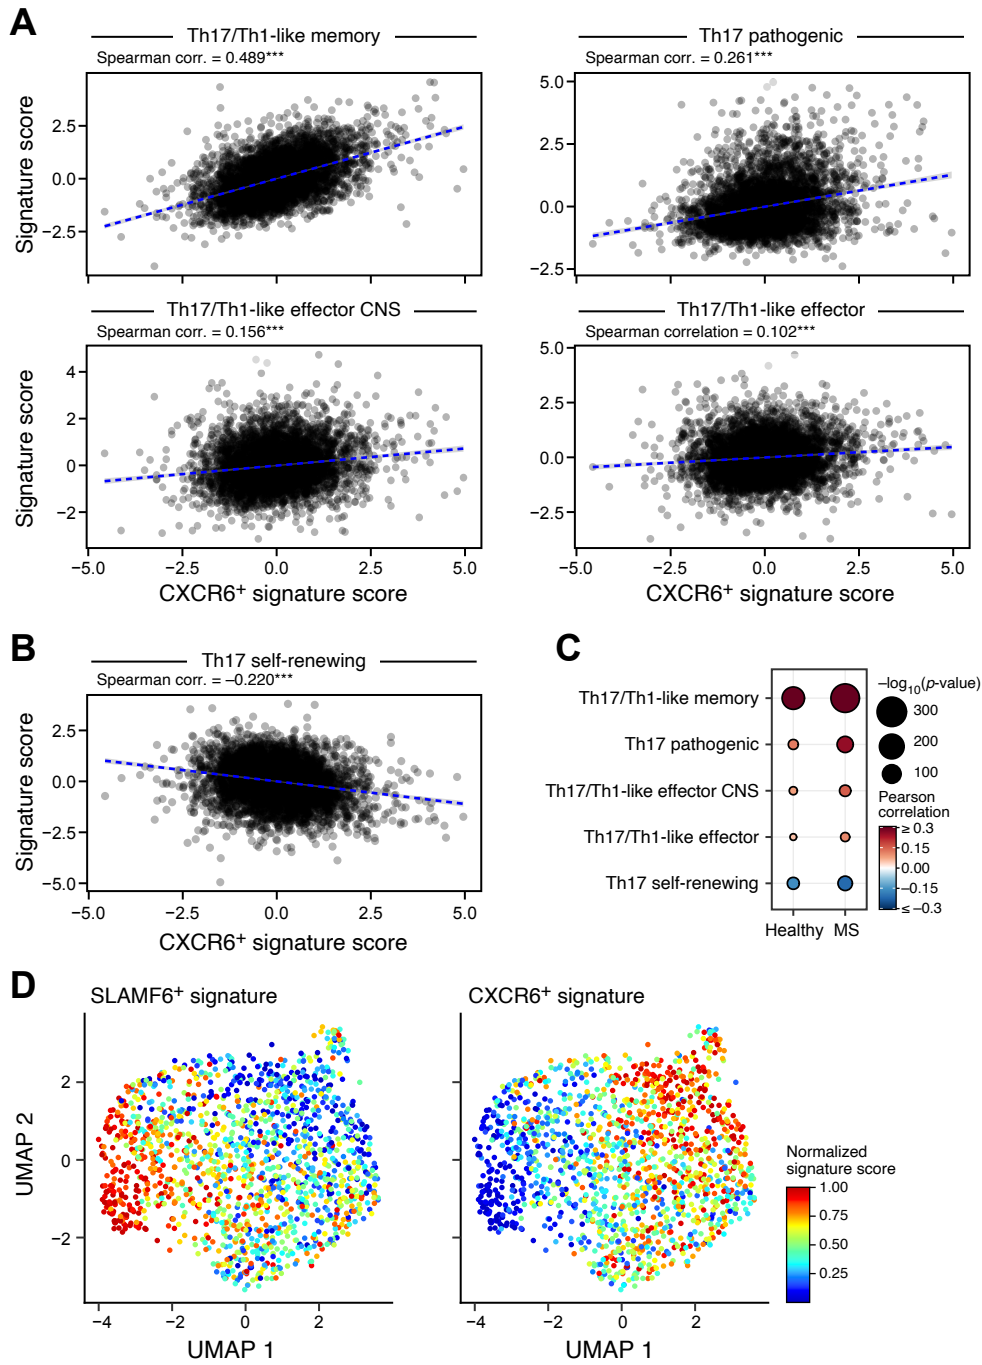

Supplement: NIHMS1758271-supplement-5.pdf [file NIHMS1758271-supplement-5.pdf]

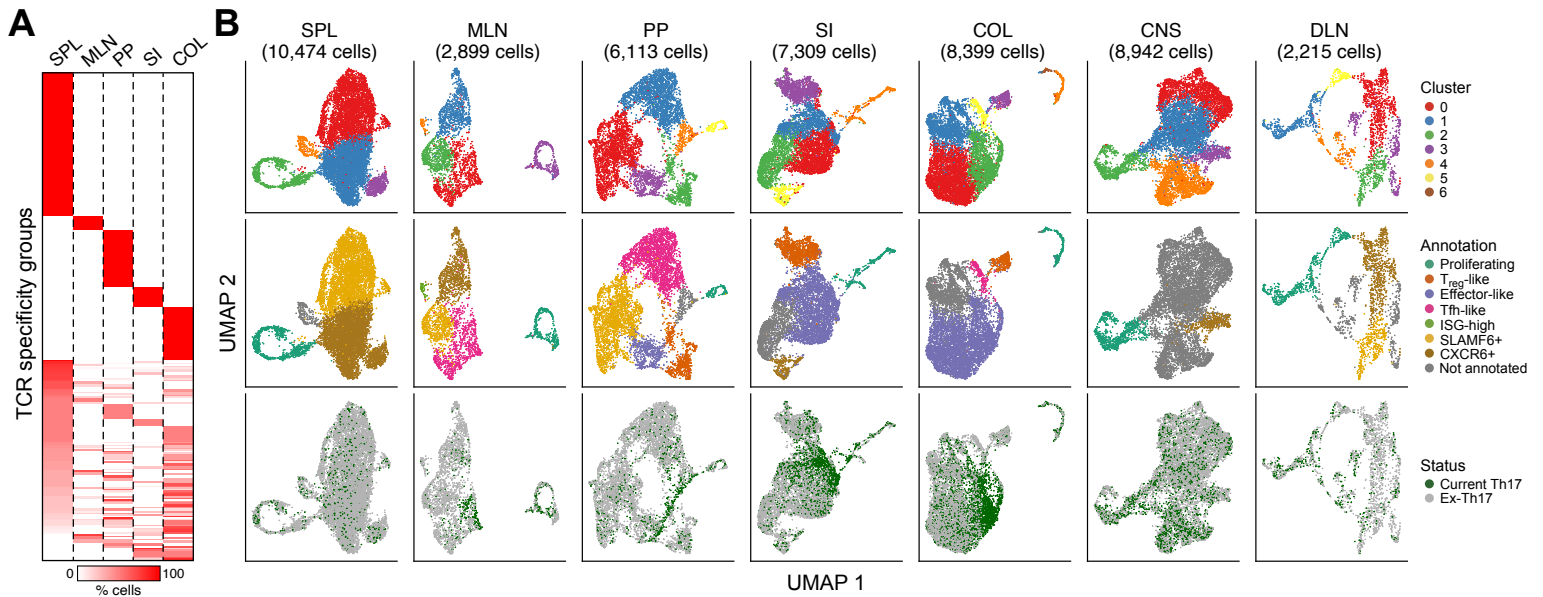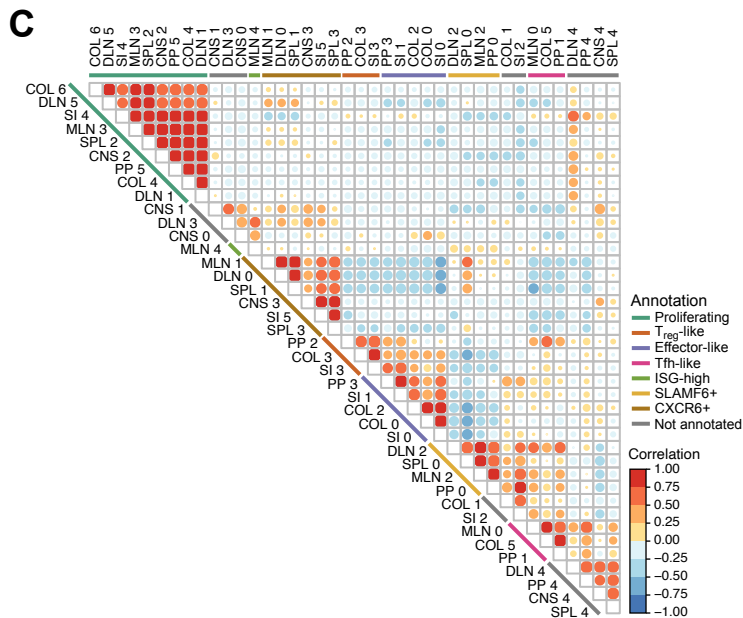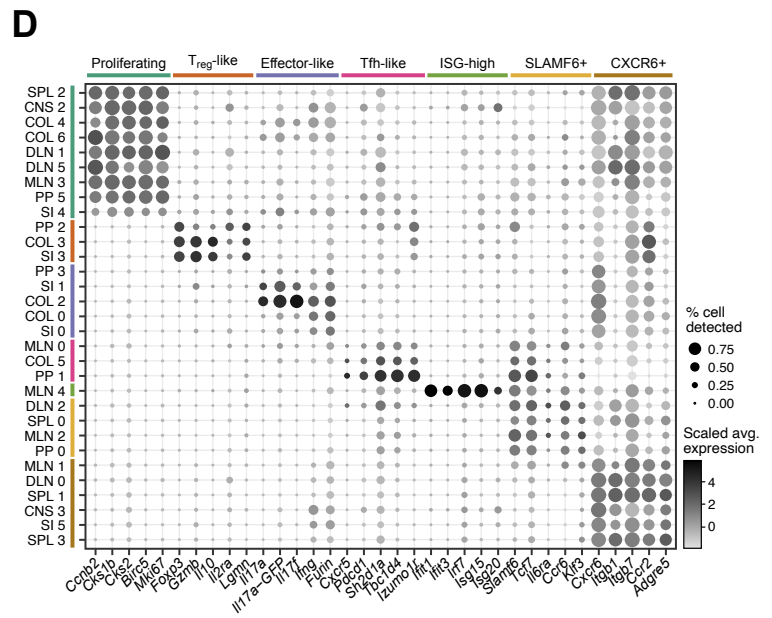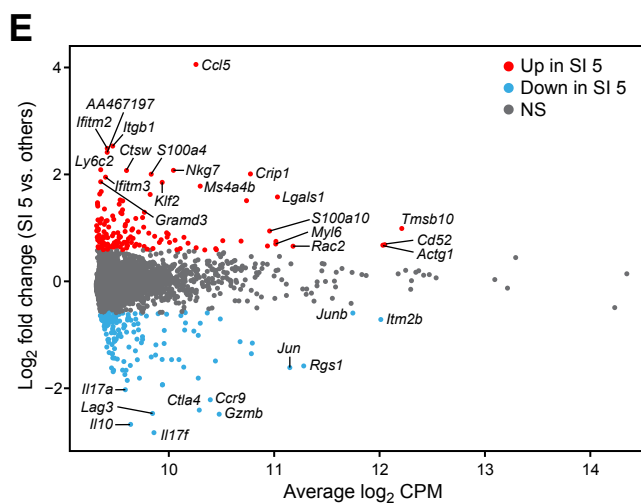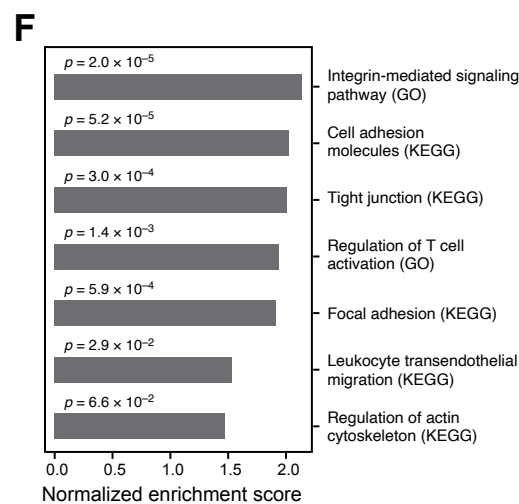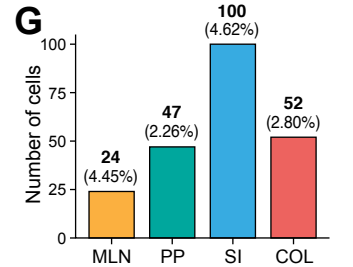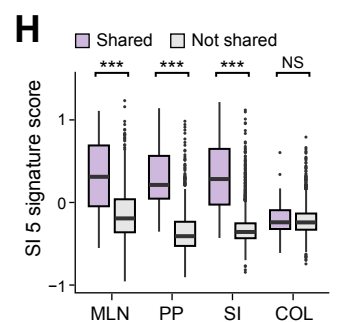

Supplement: NIHMS1758271-supplement-6.pdf [file NIHMS1758271-supplement-6.pdf]

# Supp. Fig. 7

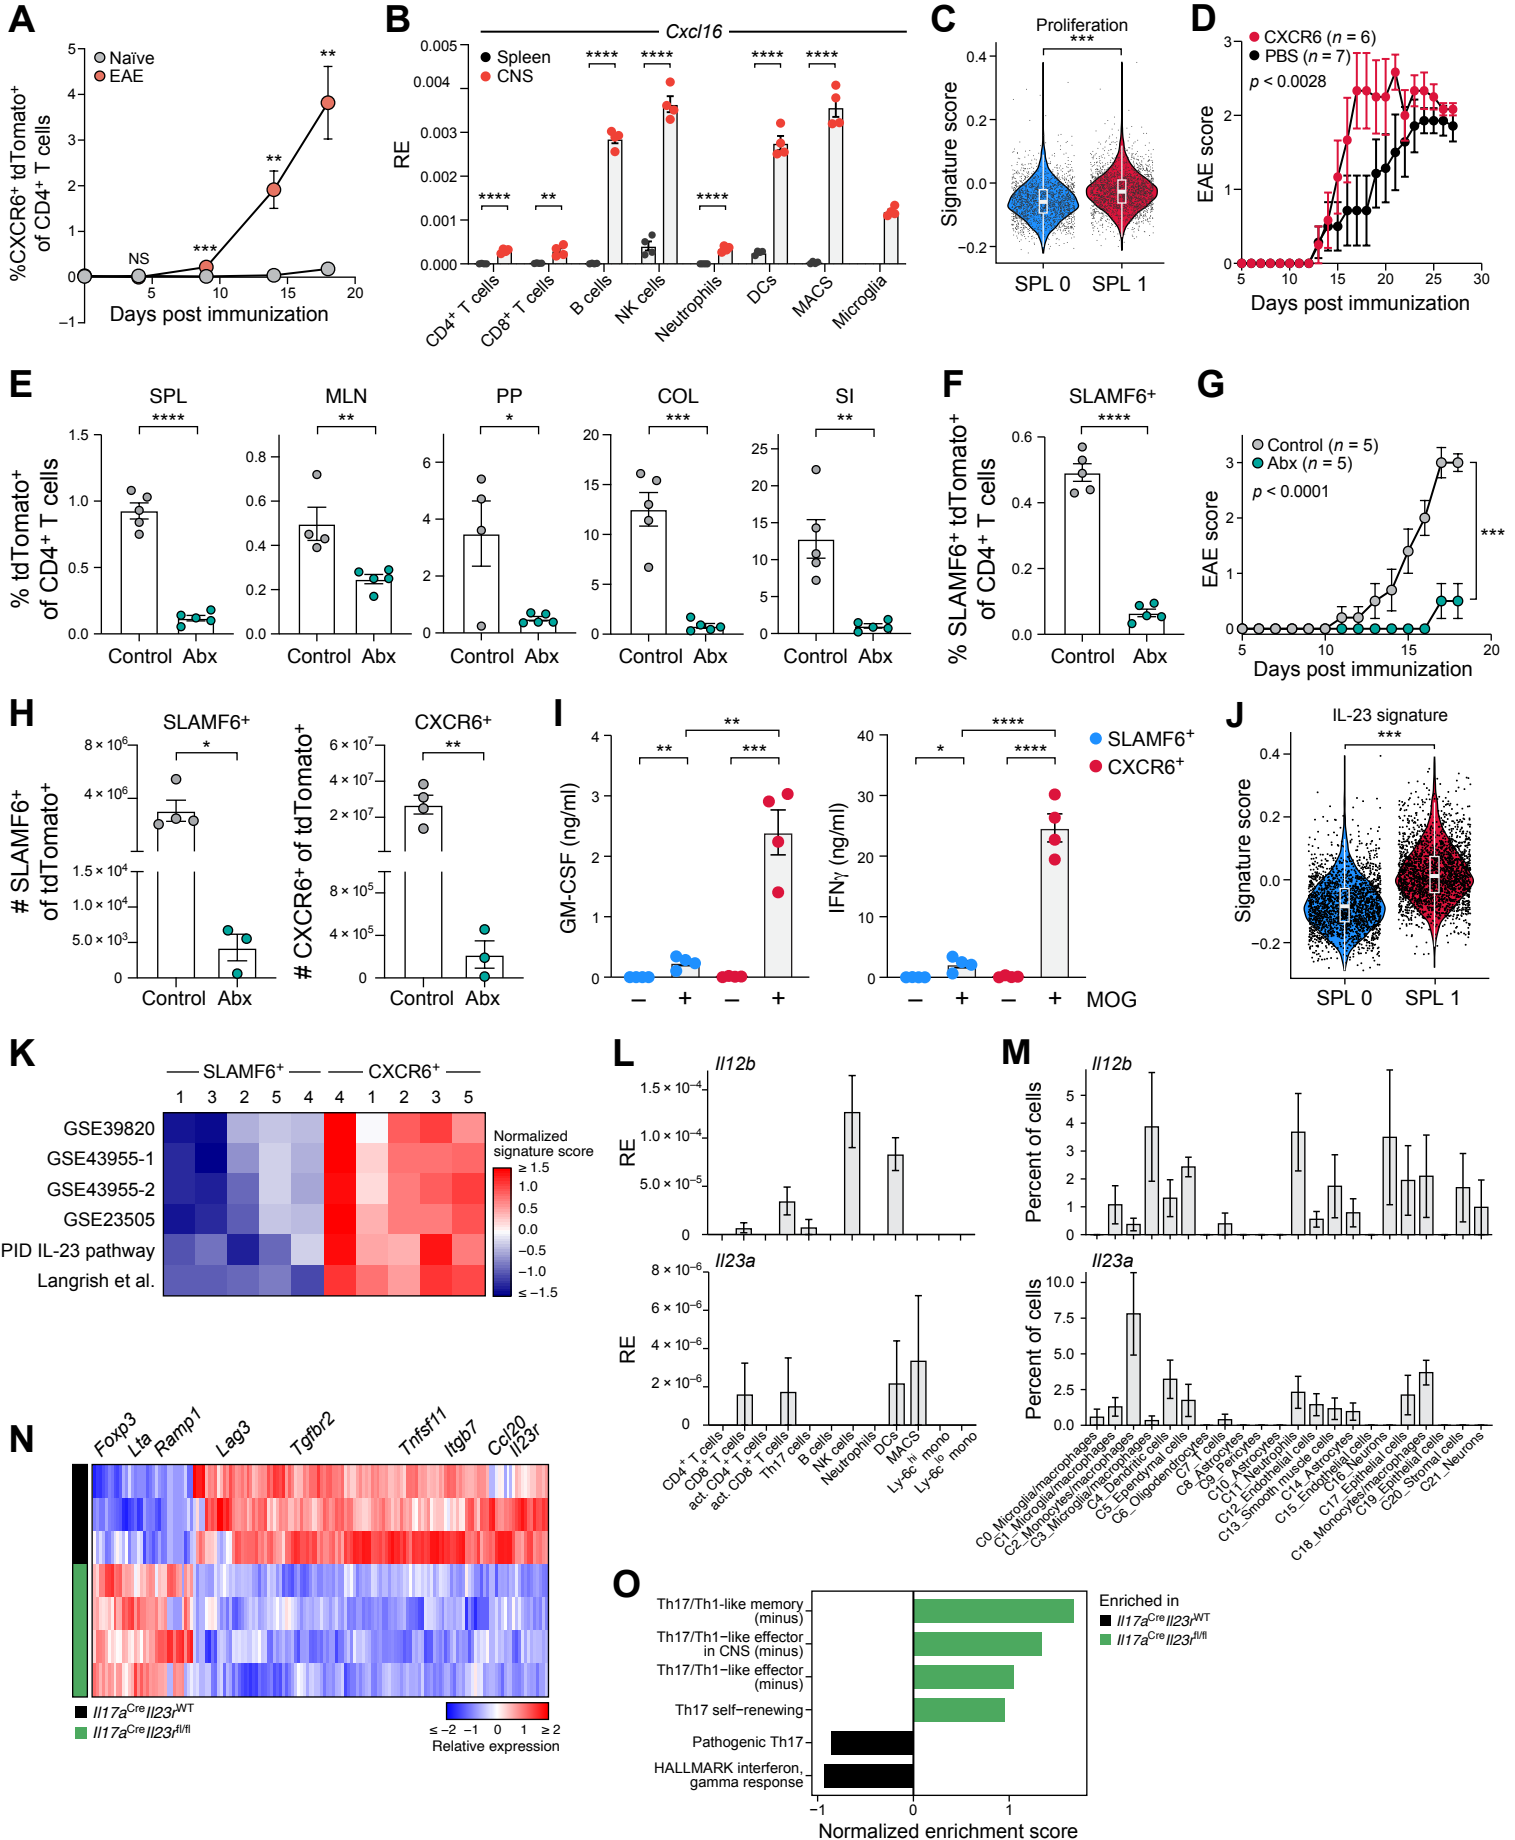

Supplement: NIHMS1758271-supplement-7.pdf [file NIHMS1758271-supplement-7.pdf]
